# Supplementary material for: A Comprehensive Analysis of Microflora and Metabolites in the Development of Ulcerative Colitis into Colorectal Cancer Based on the Lung–Gut Correlation Theory
Source: MDPI journal article supplement (doi:10.3390/molecules27185838), 2022-09-08

## Structure

### 1. 3-Hydroxyanthranilic Acid

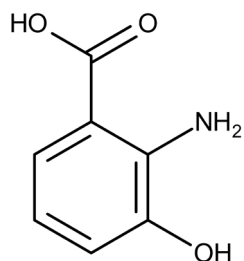

## 2. 3-Methylxanthine

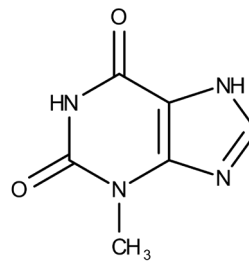

### 3. L-Dopa

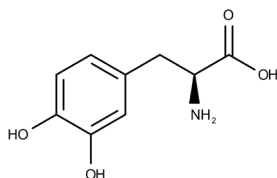

#### 4. Oleic acid

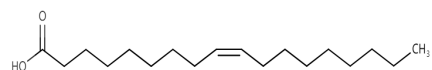

## 5. Tetrahydrocortisone

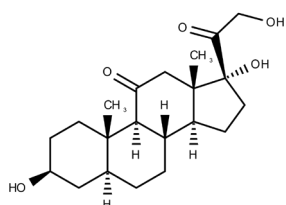

6. Isopentenyladenine-9-N-glucoside

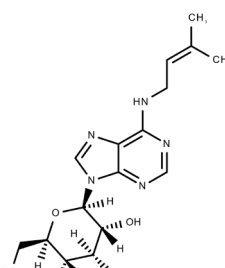

## 7. 4-Hydroxytamoxifen

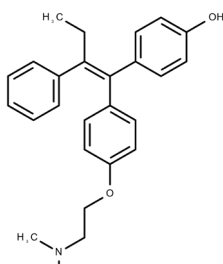

### 8. N-Stearoyl phenylalanine

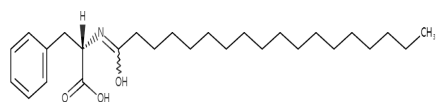

9. LysoPC(16:0/0:0)

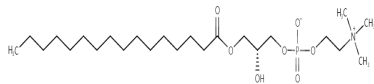

10. Taurocholic acid

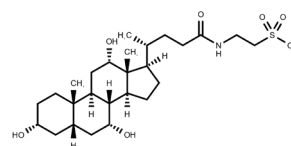

11. N-Acetylaminooctanoic acid

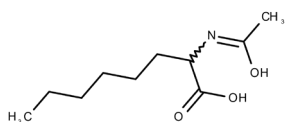

12.N-Acetylserotonin

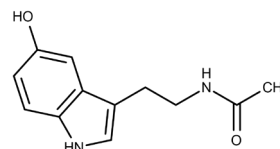

13.Tetradecanedioic acid

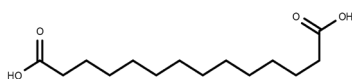

14.alpha-Linolenic acid

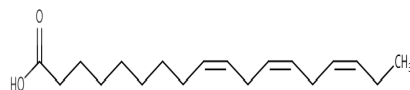

15. (9E,11E)-Octadecadienoic

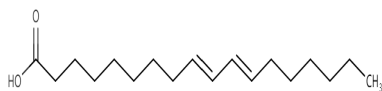

16.Guanosine

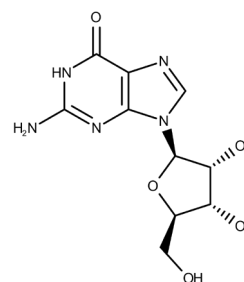

17. Oleic acid

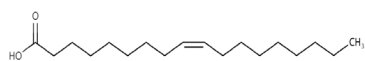

18. Stearic acid

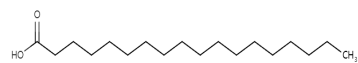

19.Hexadecanedioicacid

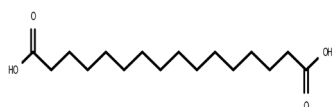

20. Eicosadienoic acid

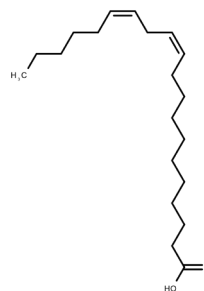

21.Tricosanoic acid

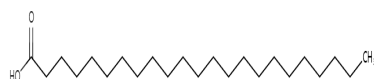

22.Tetracosanoic acid

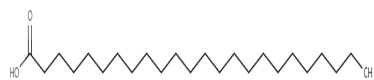

23.12b-Hydroxy-5b-cholanoic acid

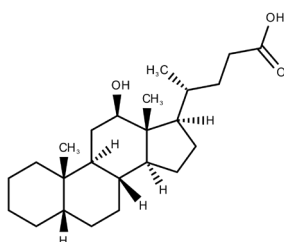

24.S-Lactoylglutathione

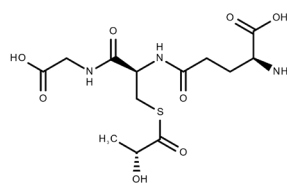

25.7-Hydroxy-3-oxocholanoic acid

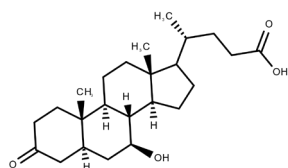

26. Succinylacetone

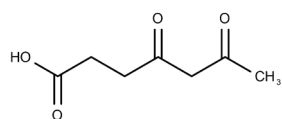

27. L-Arginine

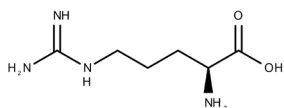

28. Hydroxykynurenine

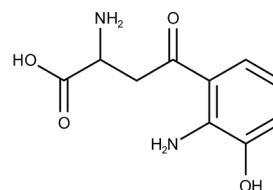

29. Deoxyinosine

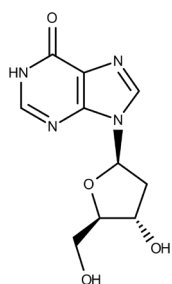

30. oleamide

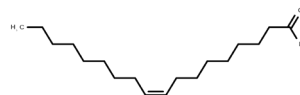

31. Sphinganine

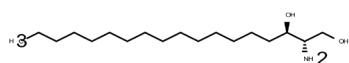

32. Phytosphingosine

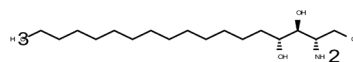

33. Tetrahydrocortisone

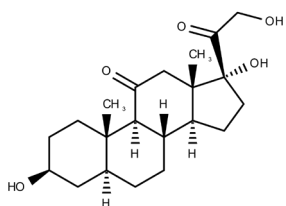

34. Tryptophan 2-C-mannoside

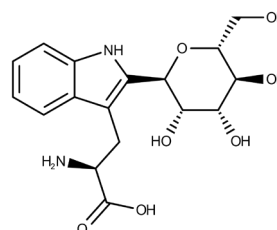

35. LysoPE (18:3(6Z,9Z,12Z)/0:0)

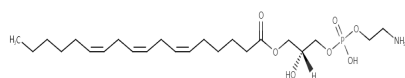

36. LysoPE (20:4(5Z,8Z,11Z,14Z)/0:0)

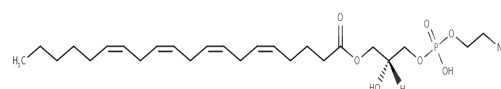

37. LysoPC (18:2(9Z,12Z)/0:0)

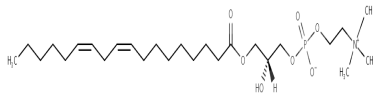

38. LysoPC (24:0/0:0)

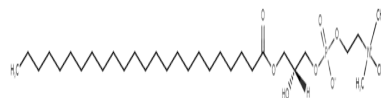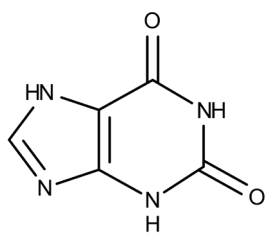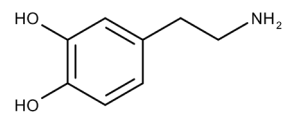

41. N-Acetyl-leucine

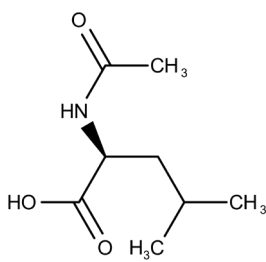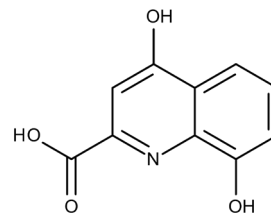

43. Tetradecanedioic acid

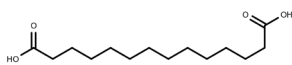

44. Adenosine

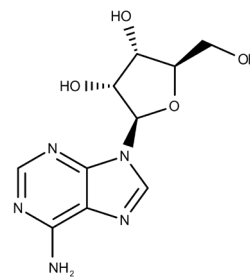

45. Heptadecanoic acid

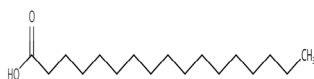

46. 3-Hydroxyhexadecanoic acid

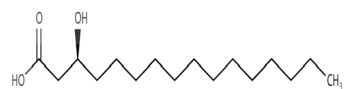

47.alpha-Linolenic acid

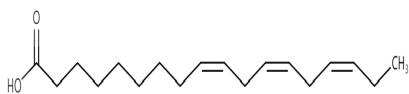

49. Oleic acid

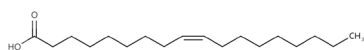

51. Hexadecanedioic acid

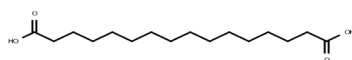

53.Deoxycholic acid

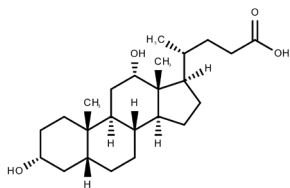

55. PE (16:0/16:0)

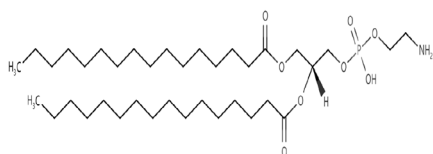

48.Tetradecanedioic acid

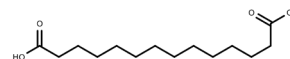

50. Xanthosine

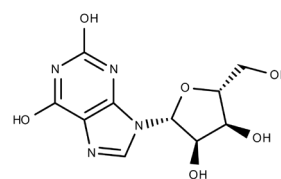

52.7-Hydroxy-3-oxocholanoic acid

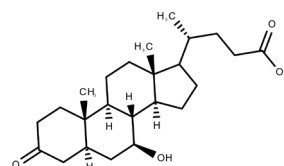

54.3a,4b,12a-Trihydroxy-5b-cholanoic acid

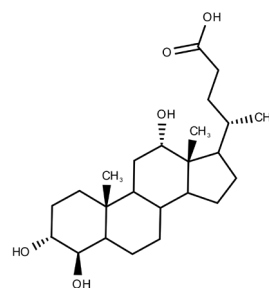

Supplement: s1 [file s1]
