# Supplementary material for: A Comprehensive Analysis of Microflora and Metabolites in the Development of Ulcerative Colitis into Colorectal Cancer Based on the Lung–Gut Correlation Theory
Source: MDPI journal article supplement (doi:10.3390/molecules27185838), 2022-09-08
Supplement: s1 [file s1]

## Supplementary Tables

**Table S1.** Related index evaluation of Model rats during modeling process (n=8,  $\bar{x} \pm SD$ )

| Group/index        | Weight(g)         | DAI score <sup>a</sup> | CMDI score <sup>b</sup> | VEGF (ng/L) <sup>c</sup> |
|--------------------|-------------------|------------------------|-------------------------|--------------------------|
| Control            | 219.6 $\pm$ 2.8   | 0.04167 $\pm$ 0.12     | 0.2500 $\pm$ 0.43       | 81.1 $\pm$ 3.7           |
| Ulcerative colitis | 179.2 $\pm$ 5.6** | 2.125 $\pm$ 0.47**     | 3.625 $\pm$ 0.99**      | 121.0 $\pm$ 2.2**        |
| Colorectal cancer  | 180.3 $\pm$ 4.2** | 2.292 $\pm$ 0.28**     | /                       | 287.6 $\pm$ 5.1**        |

\*:  $P < 0.05$ , \*\*:  $P < 0.01$ , compared with the control group. a: DAI for disease activity index. The scoring criteria for the DAI were as follows: weight score (0 point for no weight loss, 1 point for 1-5% weight loss, 2 points for 5-10% weight loss, 3 points for 10-15% weight loss, 4 points for >15% weight loss); fecal trait score (0 point for normal, 1 point for soft stool, 2 points for watery stool, 4 points for diarrhea); fecal blood status score (0 point for no blood in stool, 2 points for occult blood in stool, 4 points for apparent hemorrhage); DAI was considered the final score and was calculated using the formula,  $DAI = (\text{weight score} + \text{fecal trait score} + \text{fecal blood status score})/3$ . b: CMDI for colonic mucosal injury index. The scoring criteria for the CMDI were as follows: 0 point for normal colonic mucosa, 1 point for mild mucosal edema, 2 points for mucosal congestion and grainy roughness, 3 points for mucosal ulcer with a diameter of 0-1 cm, 4 points for no adhesion with a mucosal ulcer of 1-2 cm, and 5 points for severe adhesion with a mucosal ulcer of 1-2 cm. c: VEGF for vascular endothelial growth factor, detected by Elisa.

**Table S2.** The method validation results of lung and BALF samples.

| In lung          |                      |           |                          |           |                      |           |                  |                      |           |                          |           |                      |           |
|------------------|----------------------|-----------|--------------------------|-----------|----------------------|-----------|------------------|----------------------|-----------|--------------------------|-----------|----------------------|-----------|
| in positive mode |                      |           |                          |           |                      |           | in negative mode |                      |           |                          |           |                      |           |
| <i>m/z</i> _tr   | Precision<br>(RSD %) |           | Repeatability<br>(RSD %) |           | Stability<br>(RSD %) |           | <i>m/z</i> _tr   | Precision<br>(RSD %) |           | Repeatability<br>(RSD %) |           | Stability<br>(RSD %) |           |
|                  | t <sub>R</sub>       | Intensity | t <sub>R</sub>           | Intensity | t <sub>R</sub>       | Intensity |                  | t <sub>R</sub>       | Intensity | t <sub>R</sub>           | Intensity | t <sub>R</sub>       | Intensity |
| 191.1082_9.26    | 0.3                  | 10.4      | 1.9                      | 3.3       | 0.2                  | 2.6       | 171.1398_9.78    | 0.8                  | 10.8      | 0.9                      | 9.0       | 0.2                  | 4.6       |
| 255.2326_13.96   | 0.2                  | 12.4      | 0.2                      | 6.9       | 0.3                  | 9.2       | 257.2390_13.97   | 0.3                  | 5.6       | 0.2                      | 6.0       | 0.3                  | 7.4       |
| 299.2596_11.93   | 0.2                  | 6.7       | 0.1                      | 9.0       | 0.1                  | 11.2      | 279.2327_13.56   | 0.2                  | 6.4       | 0.1                      | 6.2       | 0.1                  | 4.2       |
| 405.1895_5.20    | 0.1                  | 12.7      | 0.1                      | 7.4       | 0.1                  | 8.8       | 385.2065_5.10    | 0.1                  | 9.9       | 0.1                      | 6.3       | 0.1                  | 4.2       |
| 493.2410_5.35    | 0.4                  | 13.0      | 0.3                      | 9.4       | 0.4                  | 6.7       | 449.2147_5.26    | 0.4                  | 7.4       | 0.3                      | 9.9       | 0.4                  | 8.9       |
| 558.3333_11.77   | 0.2                  | 13.2      | 0.1                      | 6.5       | 0.2                  | 5.2       | 540.3303_10.27   | 0.2                  | 8.7       | 0.1                      | 7.0       | 0.2                  | 4.7       |
| In BALF          |                      |           |                          |           |                      |           |                  |                      |           |                          |           |                      |           |
| in positive mode |                      |           |                          |           |                      |           | in negative mode |                      |           |                          |           |                      |           |
| <i>m/z</i> _tr   | Precision<br>(RSD %) |           | Repeatability<br>(RSD %) |           | Stability<br>(RSD %) |           | <i>m/z</i> _tr   | Precision<br>(RSD %) |           | Repeatability<br>(RSD %) |           | Stability<br>(RSD %) |           |
|                  | t <sub>R</sub>       | Intensity | t <sub>R</sub>           | Intensity | t <sub>R</sub>       | Intensity |                  | t <sub>R</sub>       | Intensity | t <sub>R</sub>           | Intensity | t <sub>R</sub>       | Intensity |
| 425.2287_8.66    | 0.2                  | 4.9       | 0.2                      | 5.6       | 0.2                  | 6.5       | 157.0377_3.19    | 1.0                  | 12.8      | 4.0                      | 14.9      | 0.7                  | 12.8      |
| 432.7596_6.76    | 0.9                  | 11.6      | 0.2                      | 10.6      | 0.5                  | 6.7       | 303.2320_14.74   | 0.9                  | 6.5       | 0.9                      | 14.7      | 1.2                  | 10.0      |
| 454.7728_6.79    | 0.8                  | 7.1       | 0.8                      | 13.9      | 0.9                  | 13.3      | 307.2614_15.85   | 0.2                  | 12.1      | 0.7                      | 13.4      | 0.6                  | 13.4      |
| 476.7857_6.80    | 0.6                  | 5.0       | 0.9                      | 6.5       | 0.4                  | 6.8       | 322.8546_2.98    | 1.1                  | 8.0       | 0.3                      | 8.8       | 0.7                  | 7.6       |
| 498.7990_6.84    | 0.4                  | 9.3       | 0.6                      | 13.9      | 0.7                  | 14.4      | 327.2296_14.40   | 0.6                  | 9.4       | 1.6                      | 14.6      | 0.7                  | 13.8      |
| 518.3207_11.51   | 0.4                  | 8.9       | 0.1                      | 11.4      | 0.1                  | 9.9       | 447.2741_9.85    | 0.6                  | 14.7      | 0.8                      | 13.6      | 0.4                  | 13.1      |

**Table S3.** The statistics of Alpha diversity index values of each sample. (n=4)

| Sample name | OTU  | shannon | simpson | chao1    | ACE      | coverage |
|-------------|------|---------|---------|----------|----------|----------|
| C1          | 393  | 3.397   | 0.766   | 436.784  | 448.887  | 0.999    |
| C2          | 660  | 6.161   | 0.923   | 714.638  | 718.213  | 0.998    |
| C3          | 535  | 3.516   | 0.807   | 604.734  | 619.894  | 0.998    |
| C4          | 702  | 4.149   | 0.834   | 770.703  | 782.326  | 0.998    |
| U1          | 590  | 5.527   | 0.944   | 705.957  | 693.551  | 0.998    |
| U2          | 748  | 4.085   | 0.835   | 823.000  | 840.337  | 0.997    |
| U3          | 590  | 4.800   | 0.918   | 660.611  | 679.084  | 0.998    |
| U4          | 1077 | 5.971   | 0.927   | 1118.362 | 1119.521 | 0.998    |
| R1          | 565  | 2.044   | 0.443   | 639.043  | 649.868  | 0.998    |
| R2          | 775  | 2.511   | 0.460   | 864.013  | 884.086  | 0.997    |
| R3          | 612  | 2.772   | 0.649   | 670.508  | 687.417  | 0.998    |
| R4          | 669  | 2.157   | 0.517   | 761.329  | 780.160  | 0.997    |

OTU: Operational Taxonomic Unit; Chao1 and Ace indices measure the number of species; The Shannon and Simpson indices were used to measure species diversity (the larger the Shannon index value and the smaller the Simpson index value, the higher the species diversity of this sample was); Coverage represents the probability that the bacterial community in the sample was detected.

## Supplementary Figures

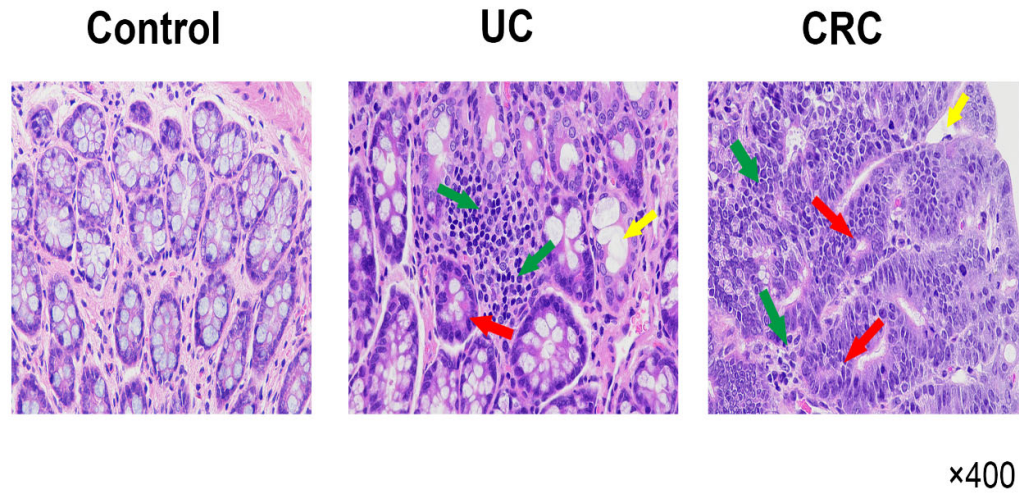

**Figure S1.** Histological changes in colon sections stained with hematoxylin and eosin of control, UC and CRC groups (400× magnification). The red arrows represent the loss of mucus in the goblet cells. The green arrows represent inflammatory cell infiltration; The yellow arrows represent intestinal epithelial vacuoles.

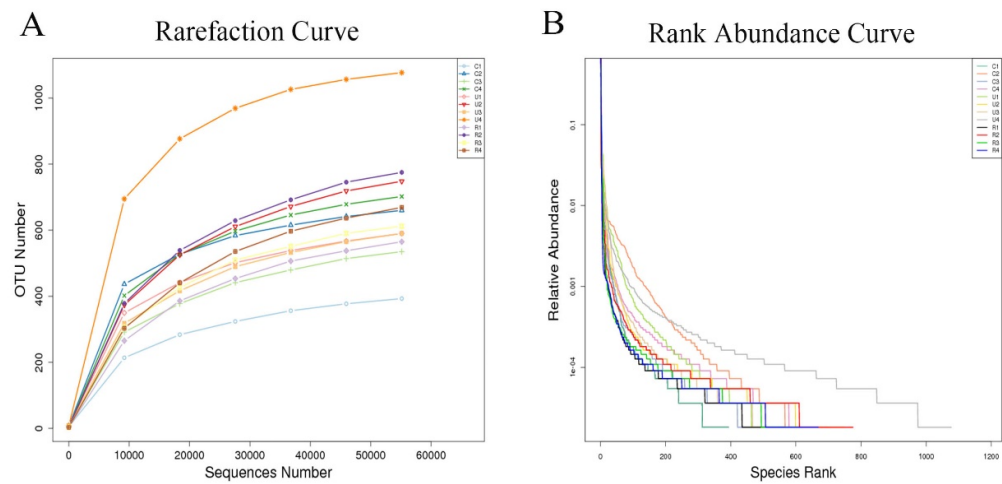

**Figure S2.** (A) Rarefaction Curve. (B) Rank Abundance Curve.
